# Supplementary material for: GP73-mediated secretion of PKM2 and GP73 promotes angiogenesis and M2-like macrophage polarization in hepatocellular carcinoma
Source: PubMed Central journal article supplement (PMC11794714; doi:10.1038/s41419-025-07391-9), 2025-02-05

**Figure 1**

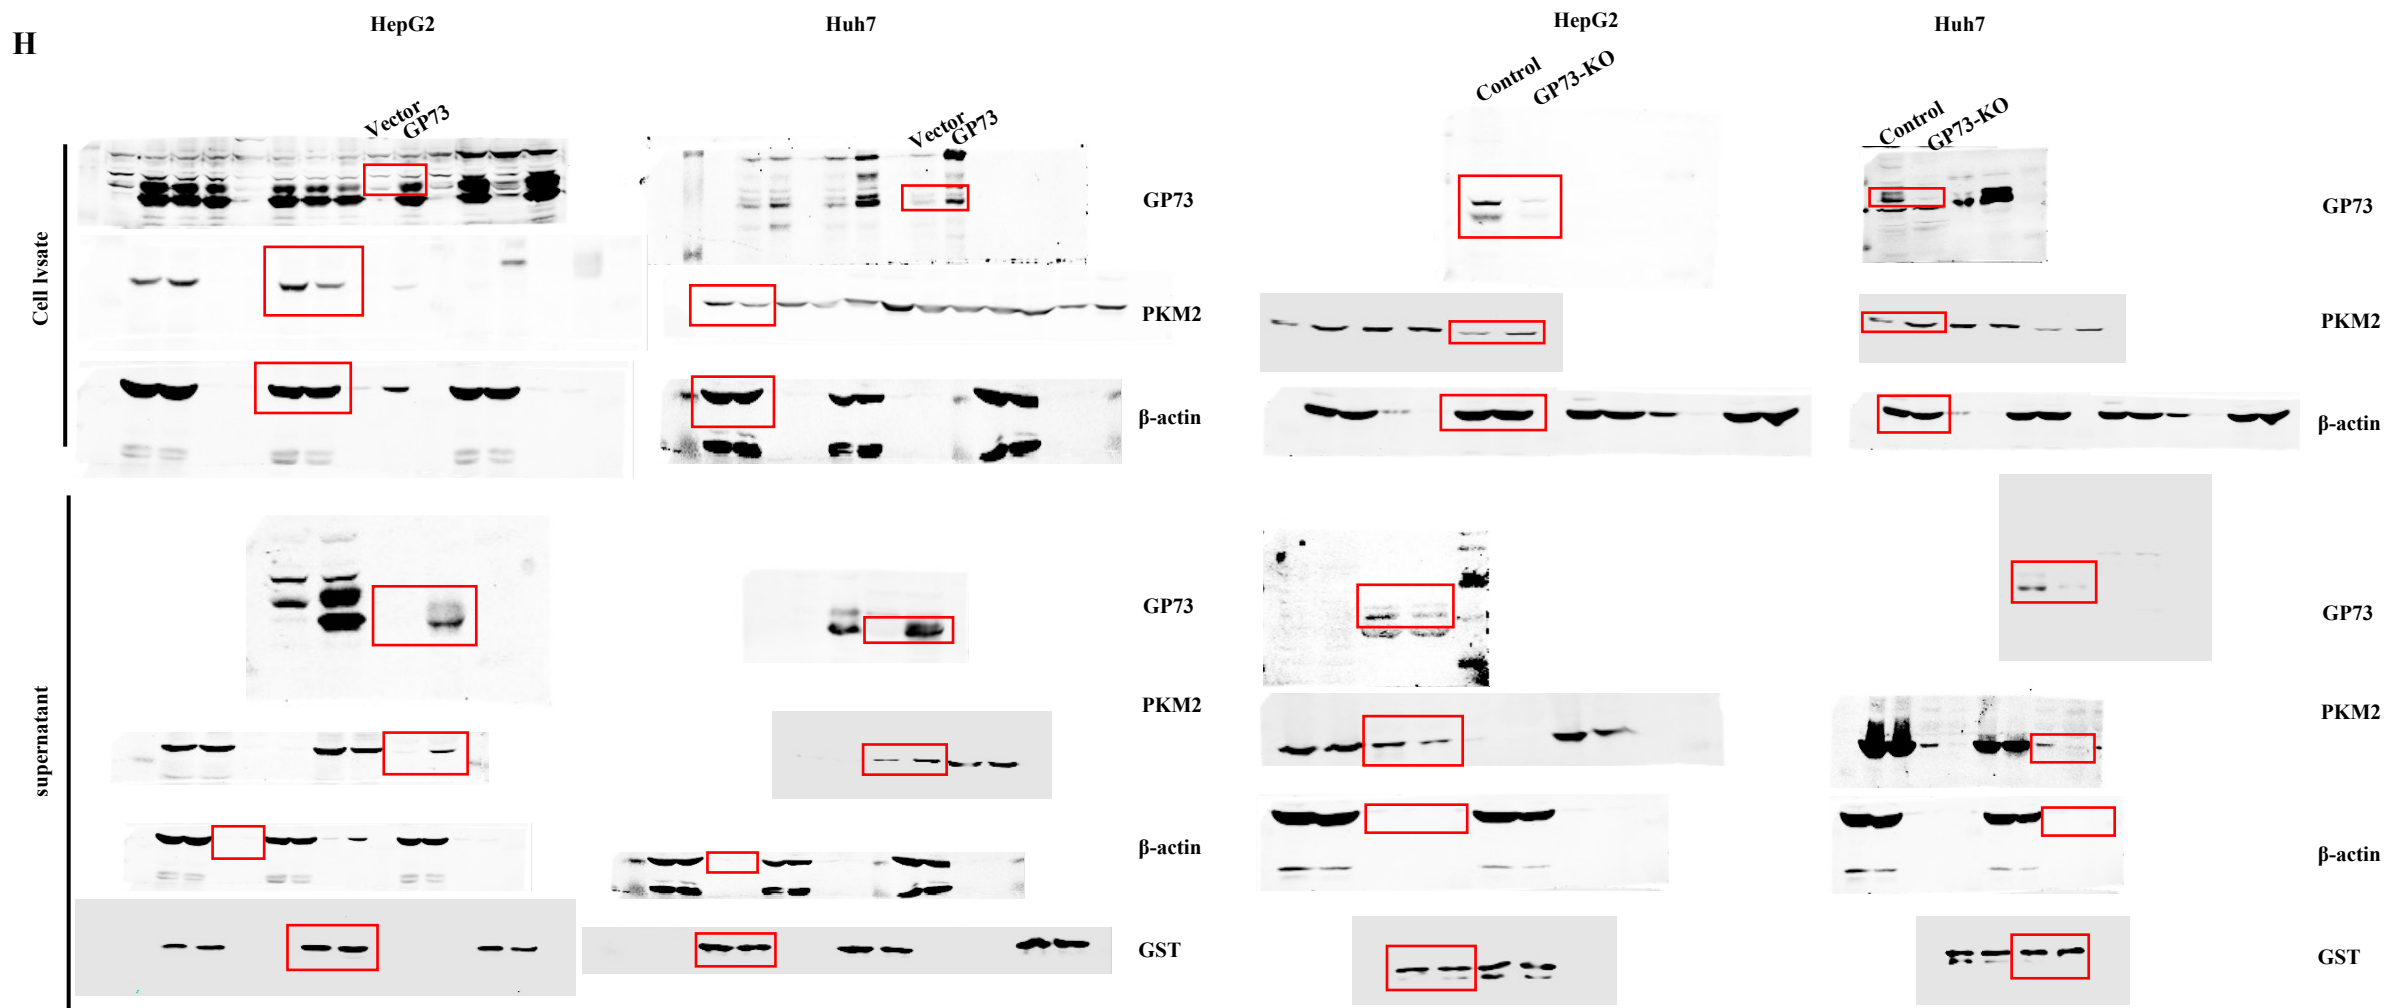

**Figure 2**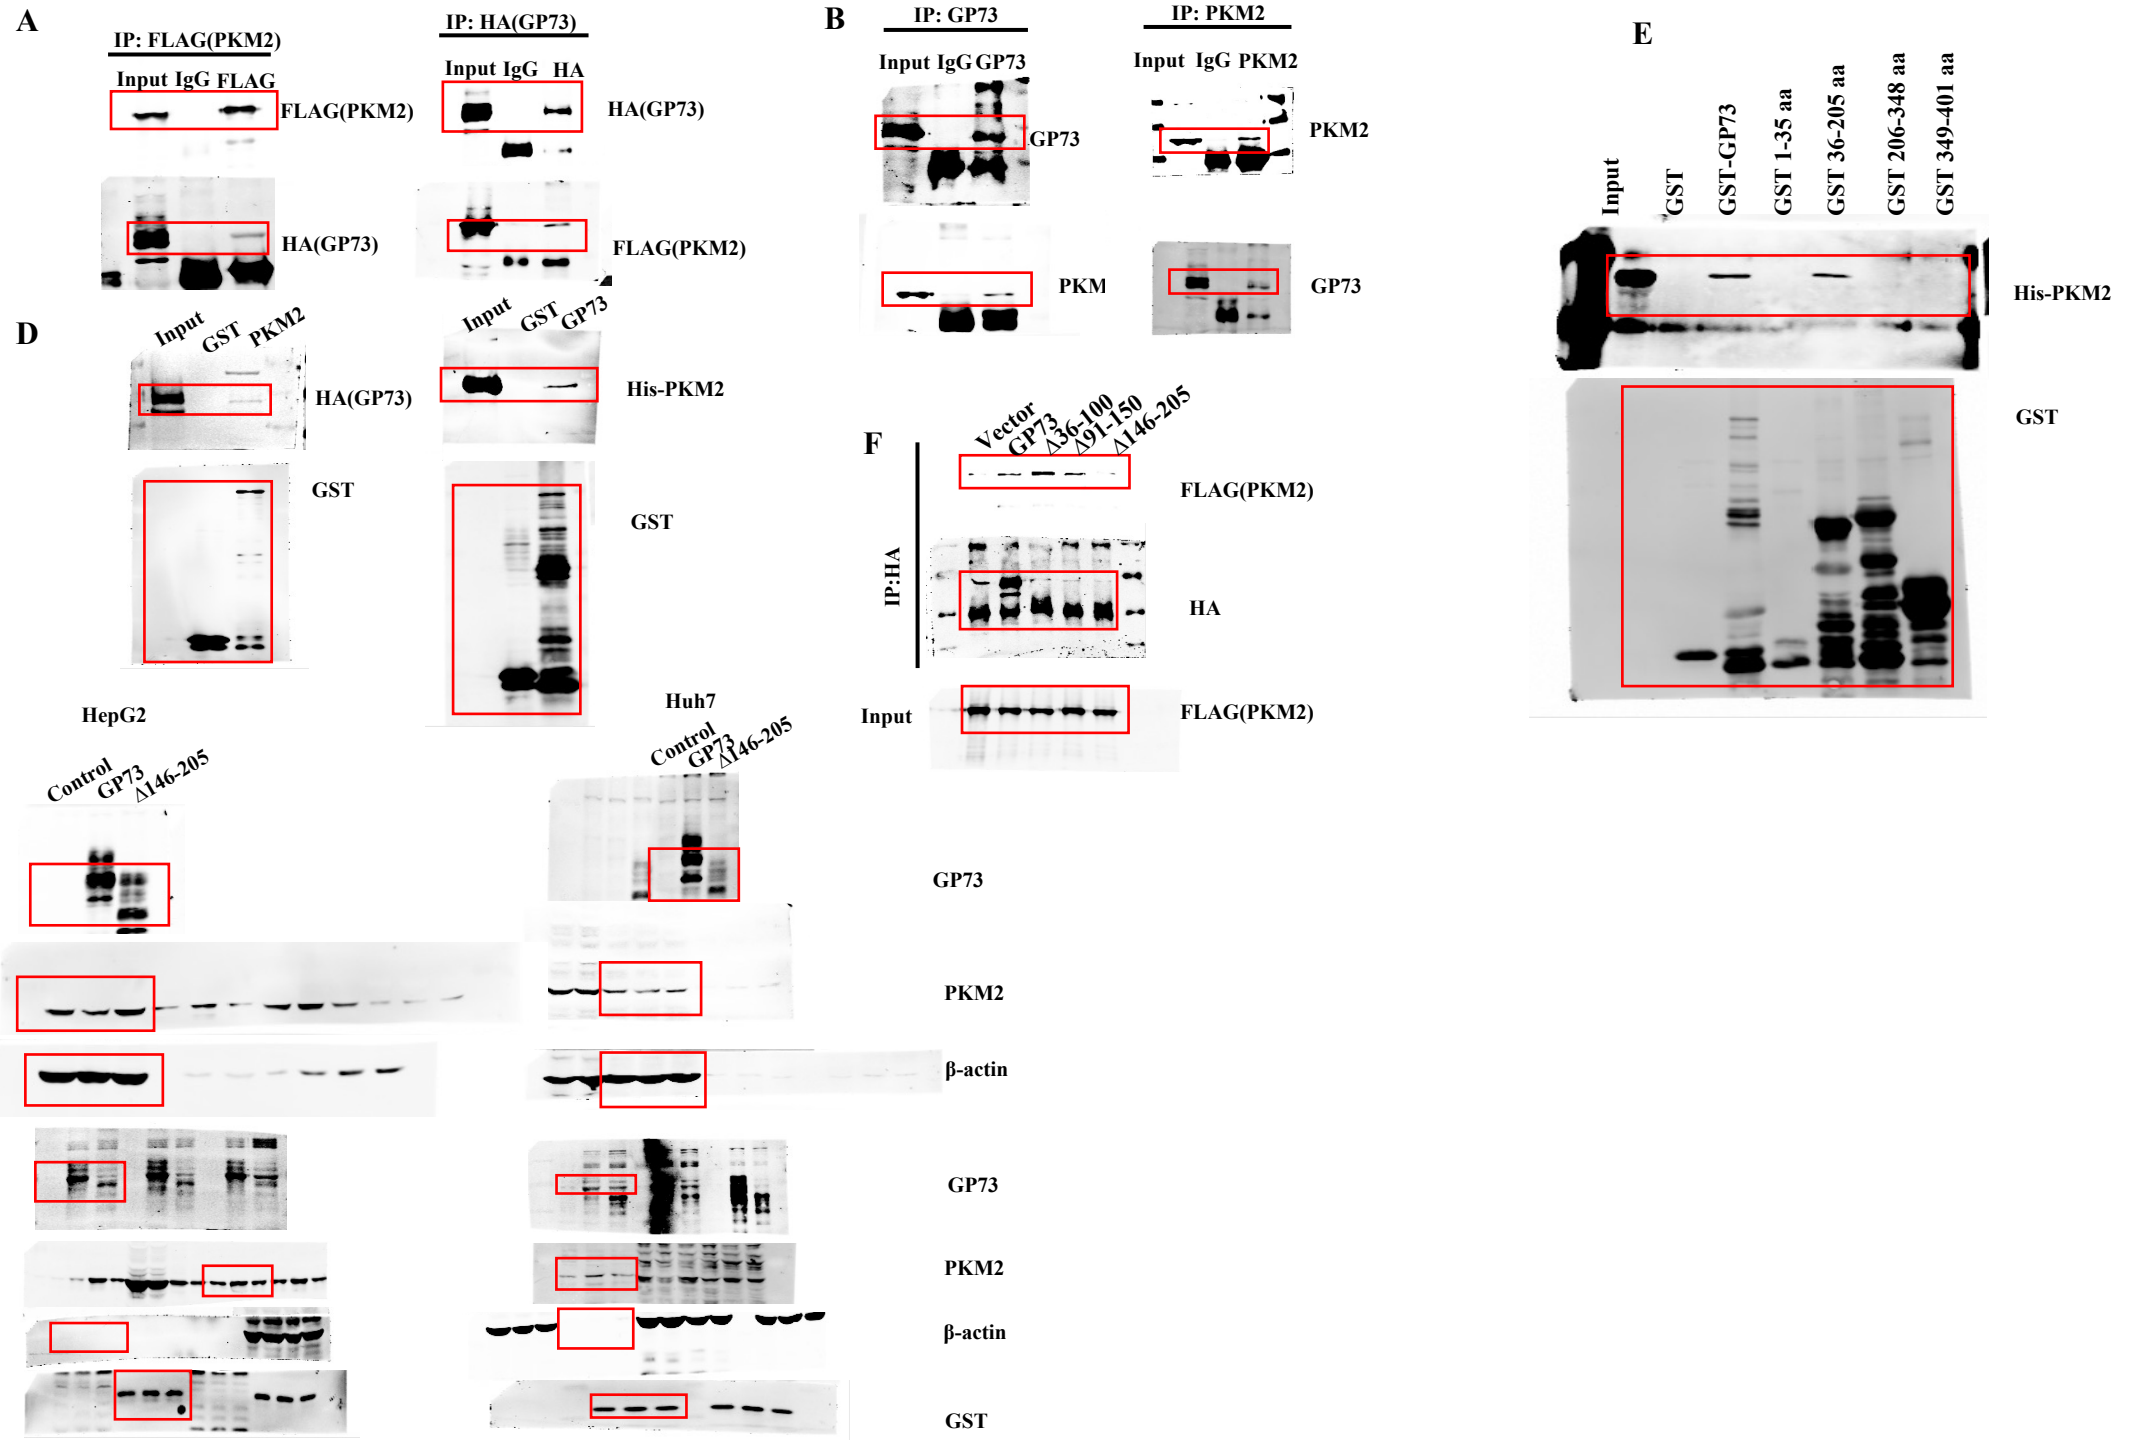

**Figure 3****E**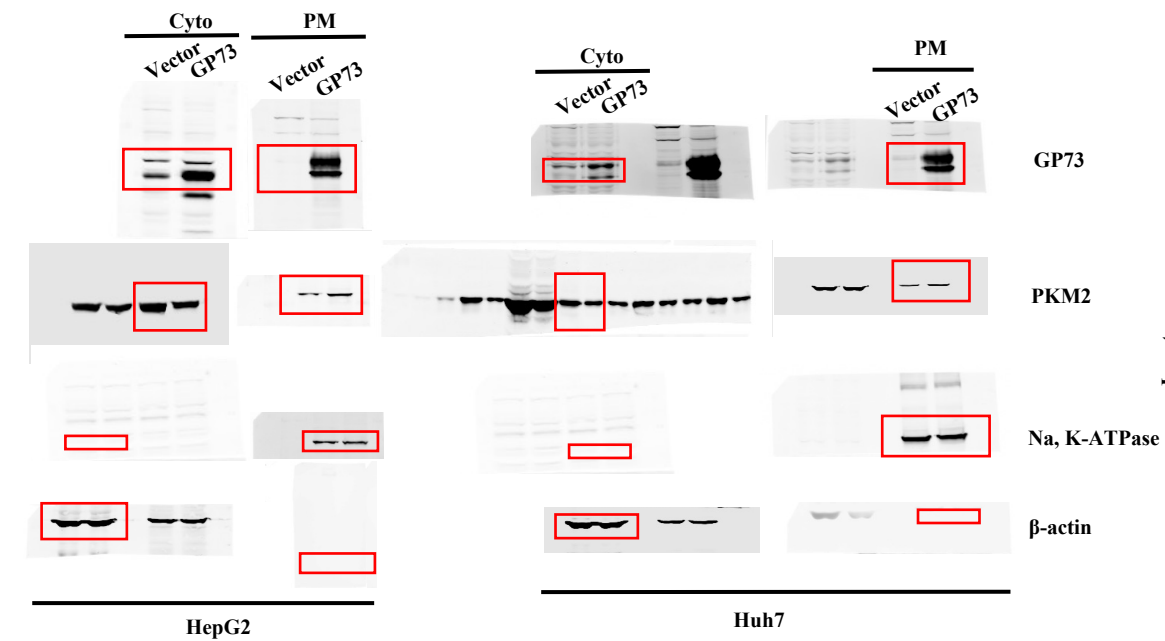**F**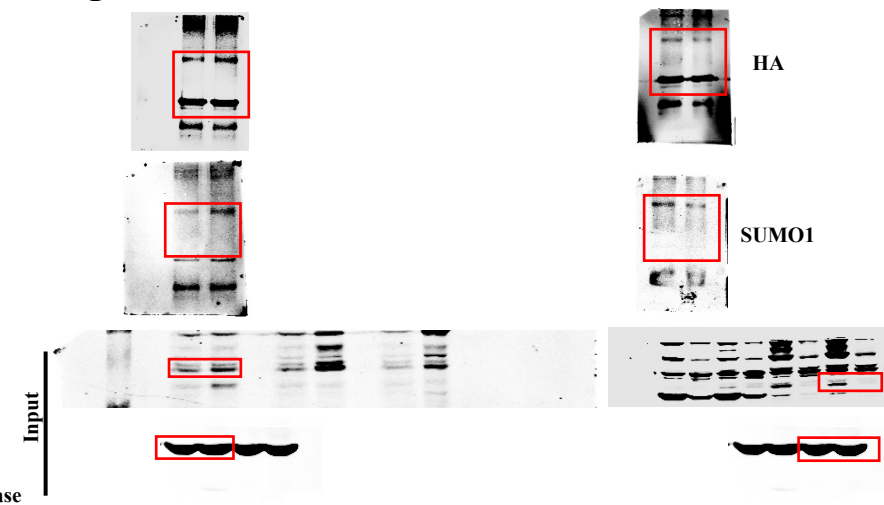**G**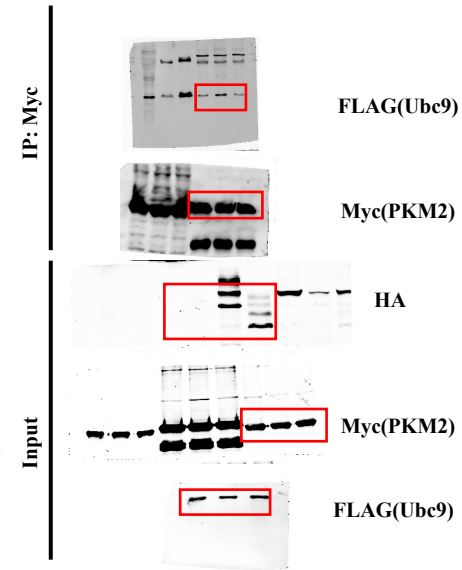**H**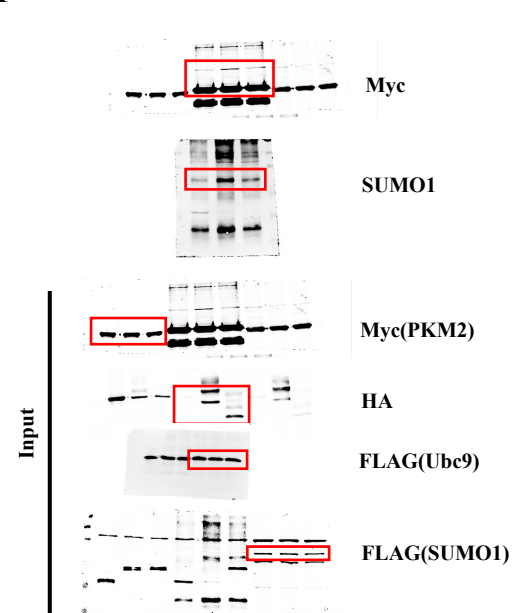**I**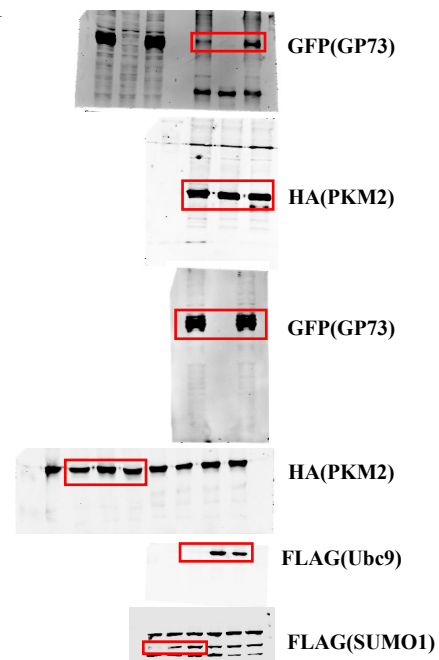**K**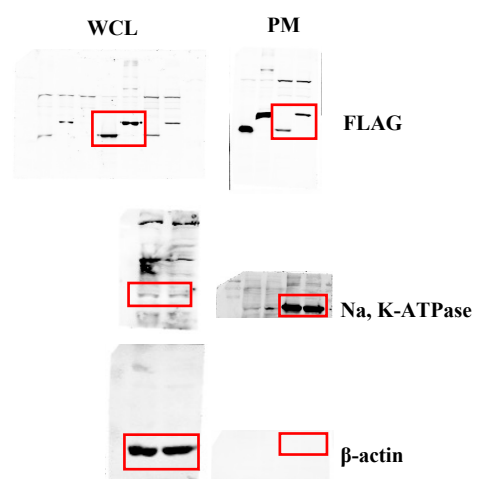**L**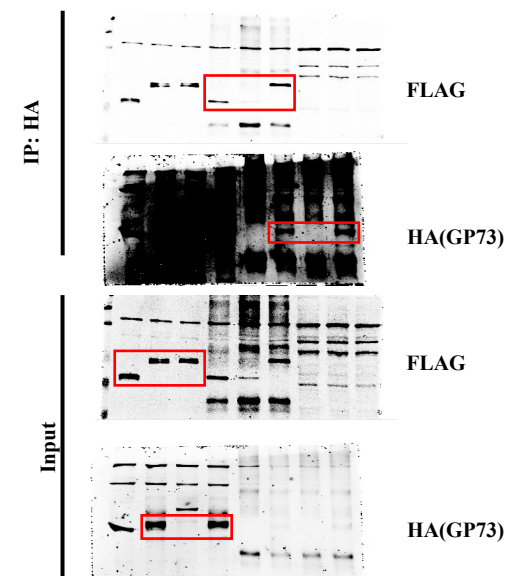

**Figure 4**

**B**

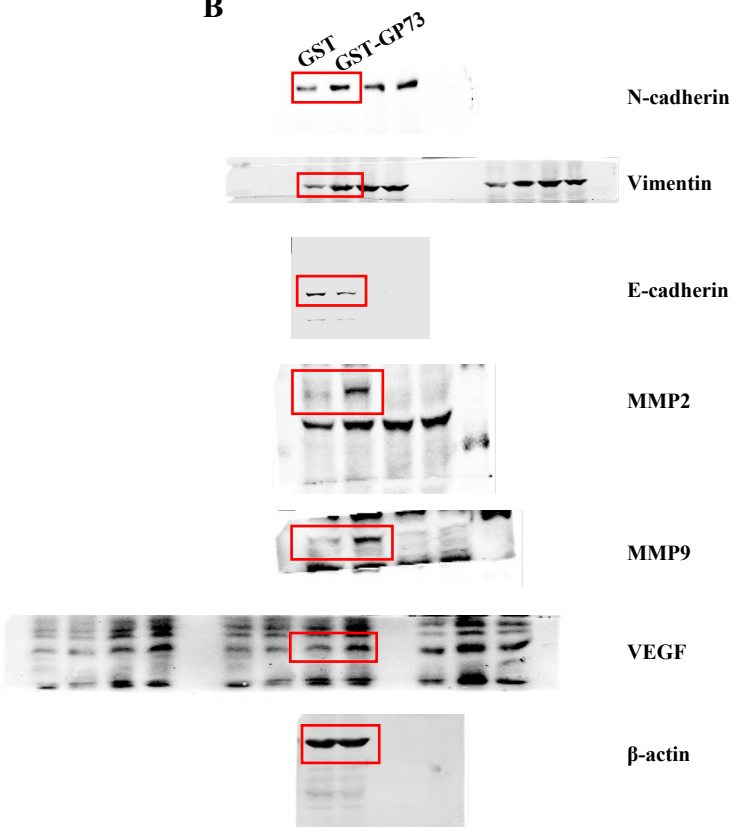

**Figure 5**

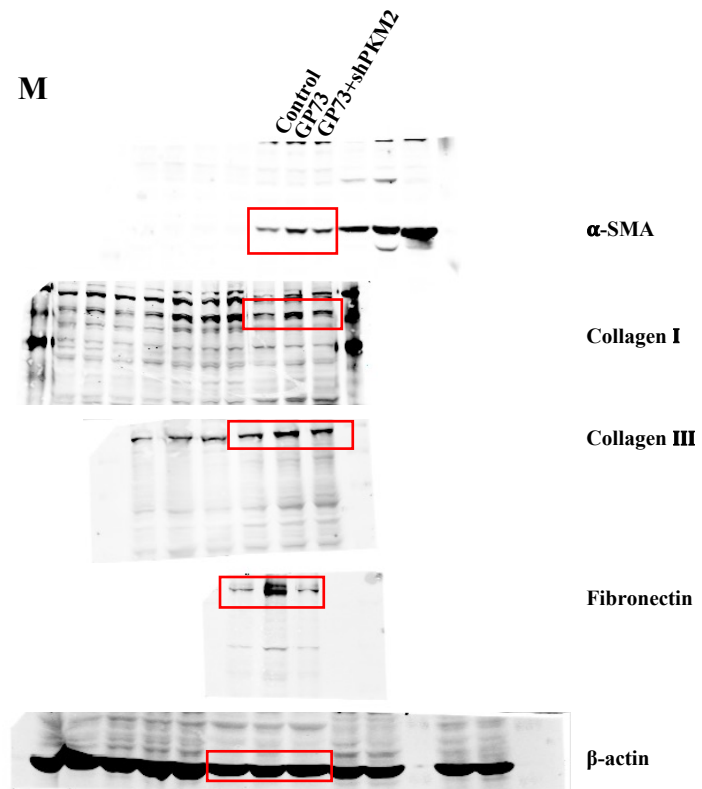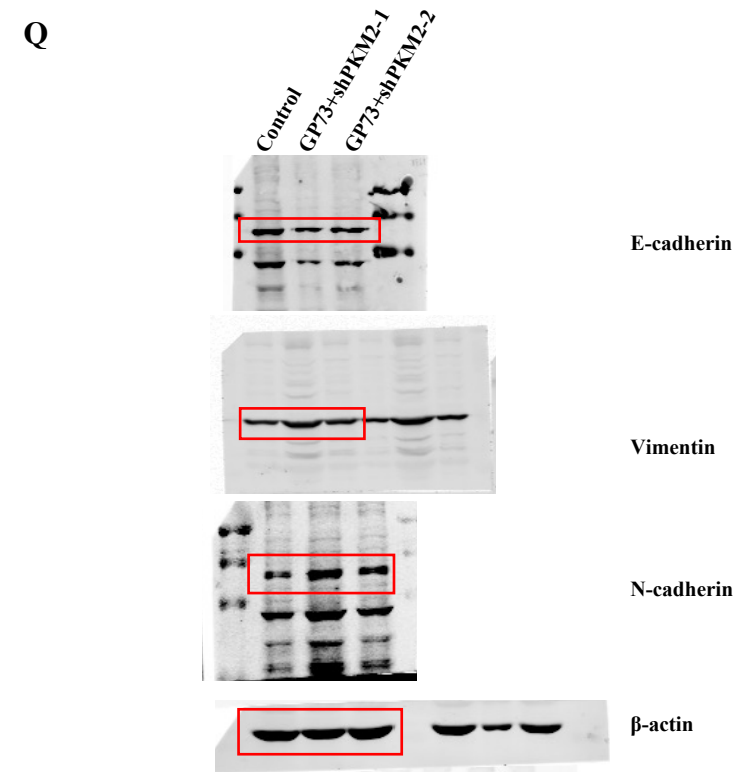

**Figure 6**

**B**

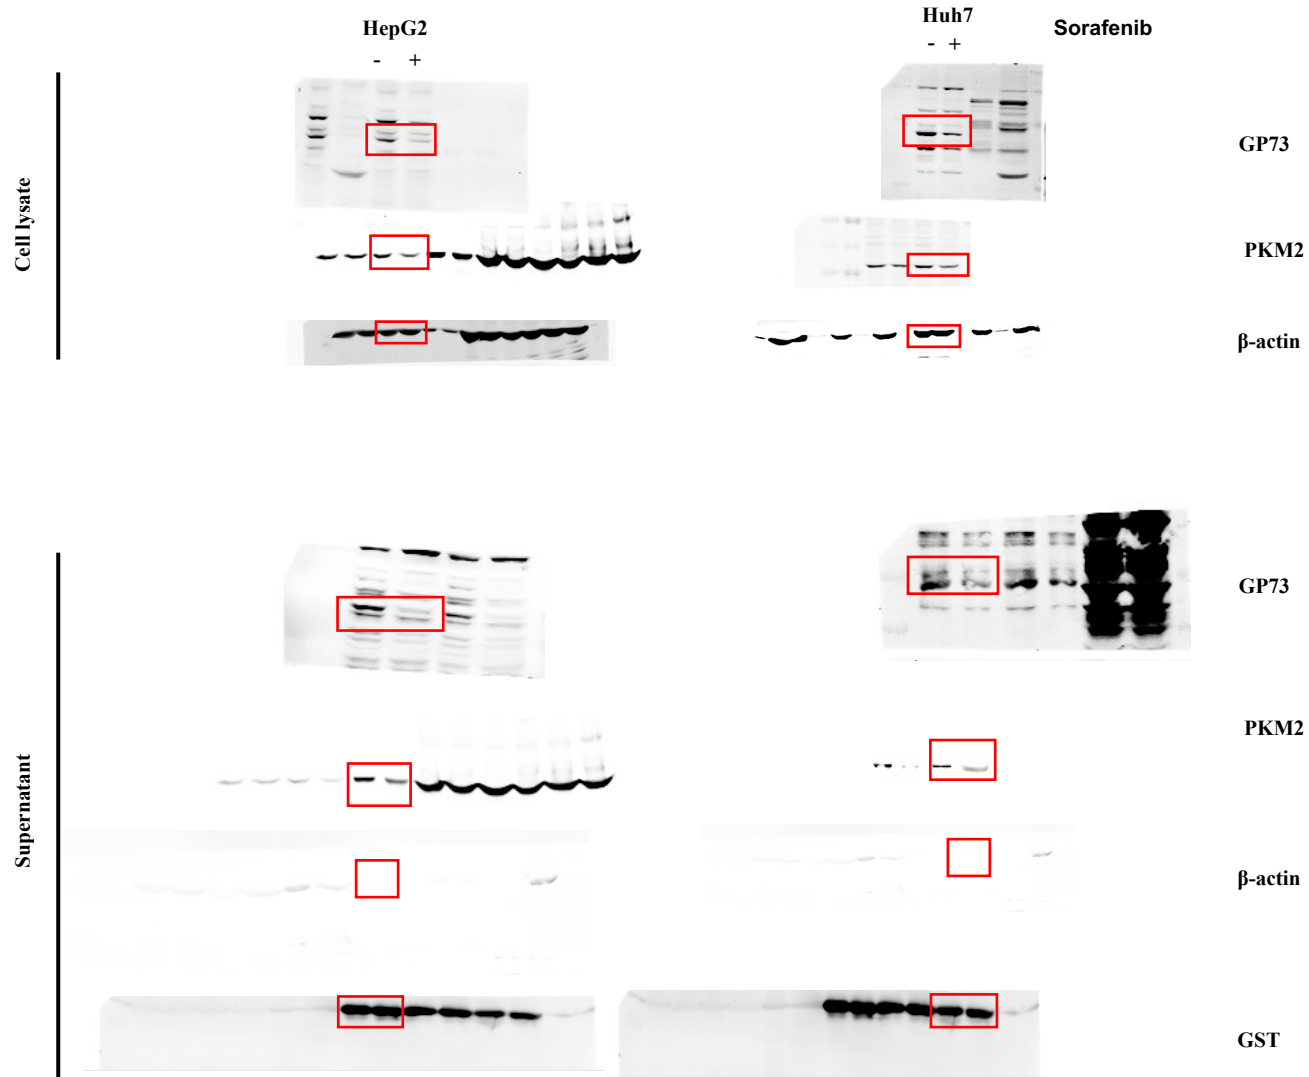

**Figure 7****A**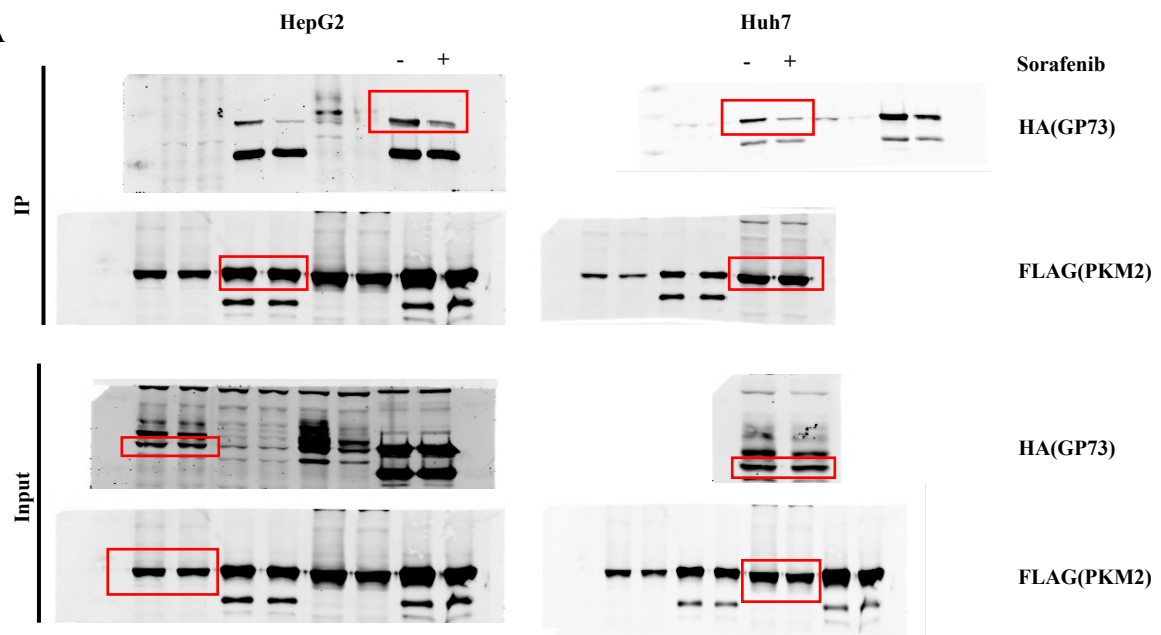**B**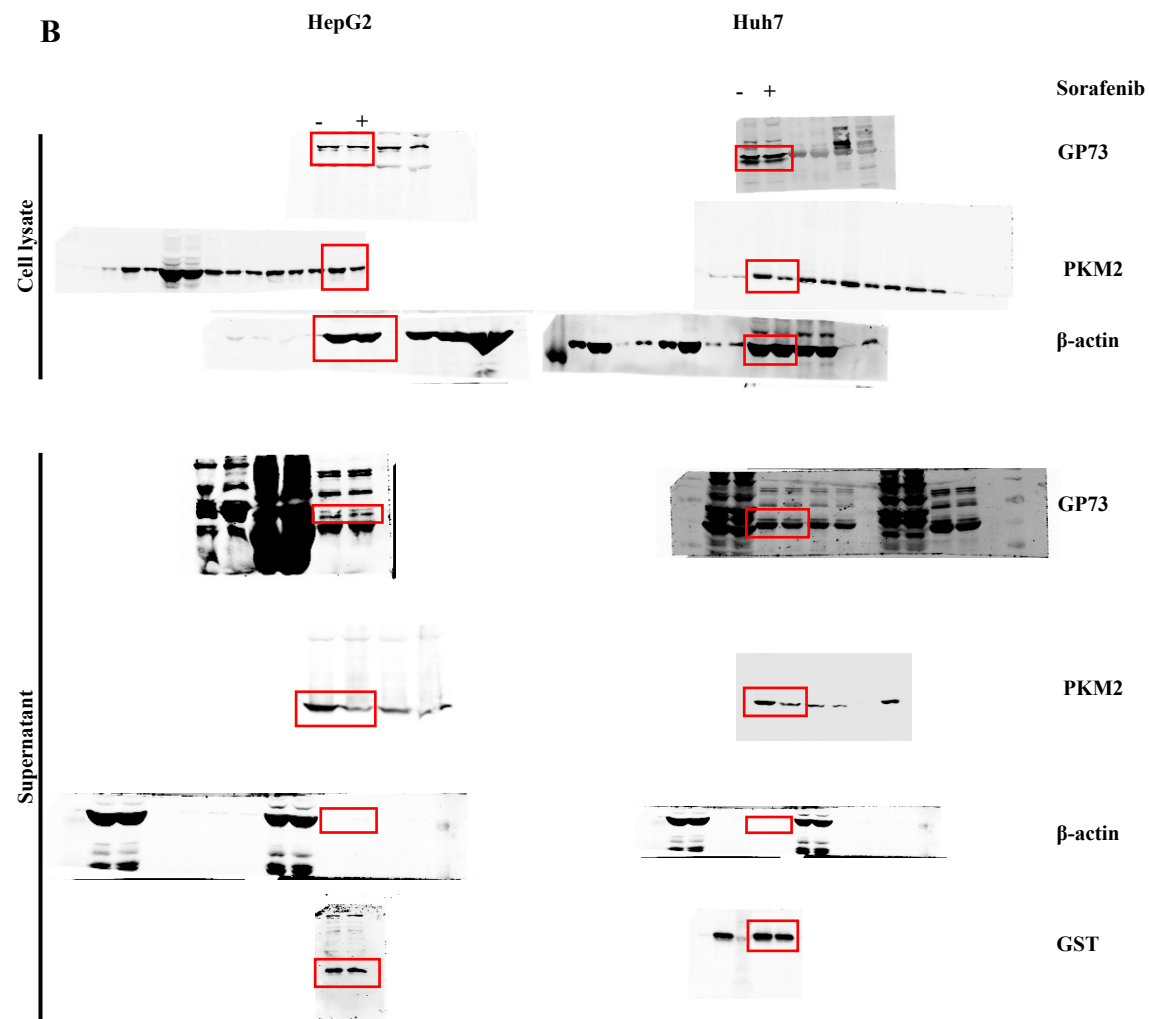**F**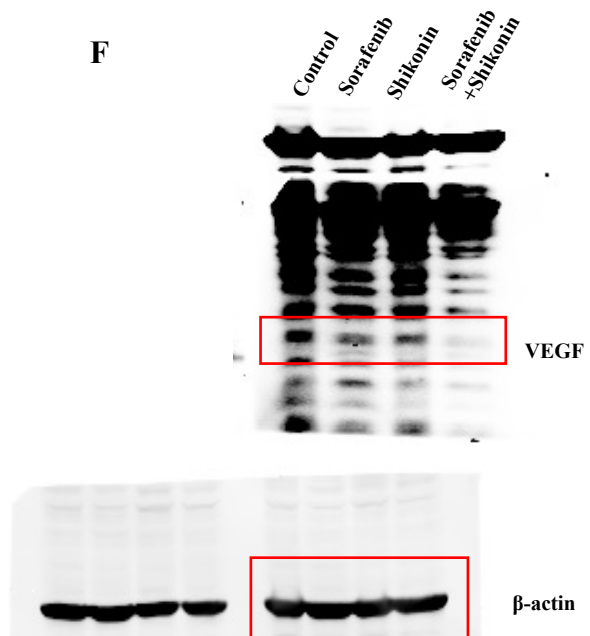

Figure S1

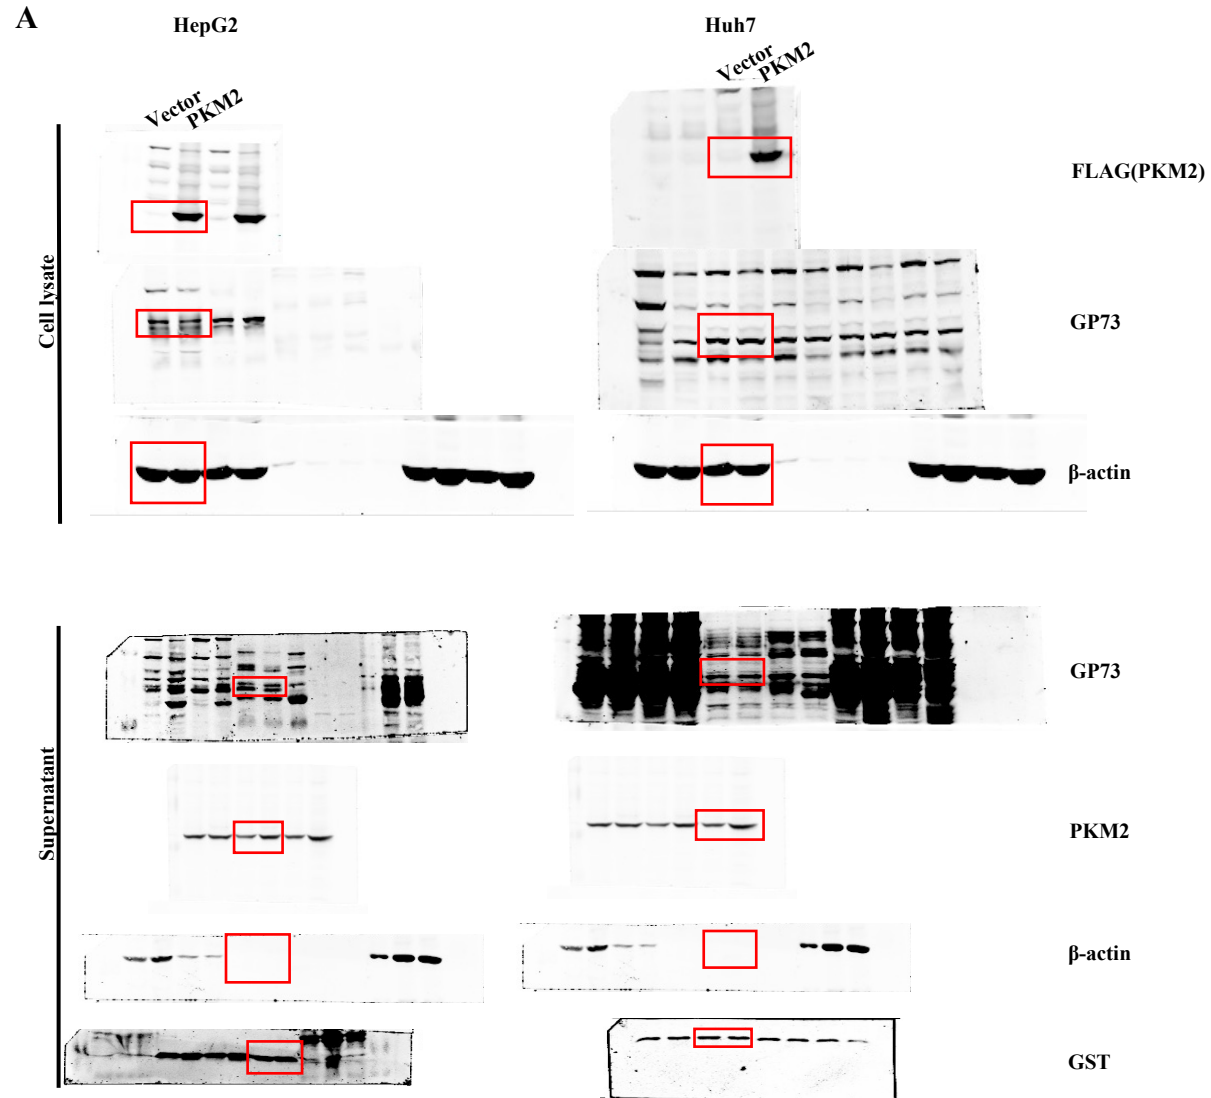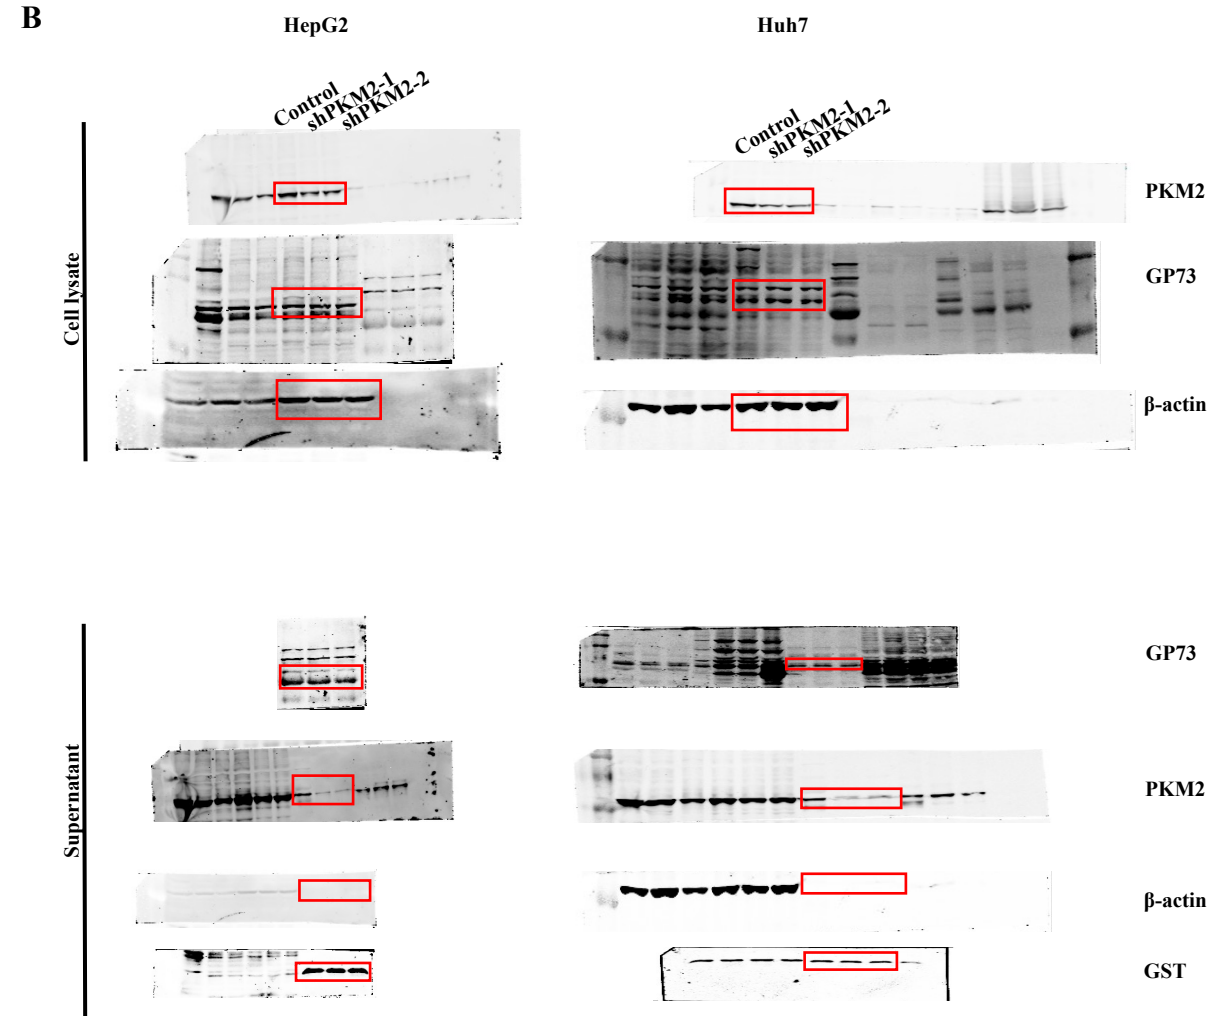



**Figure S2****A**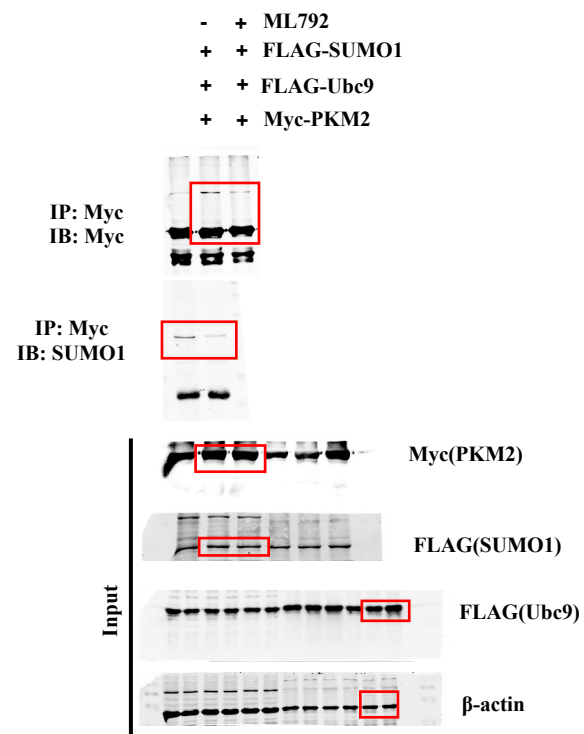**C**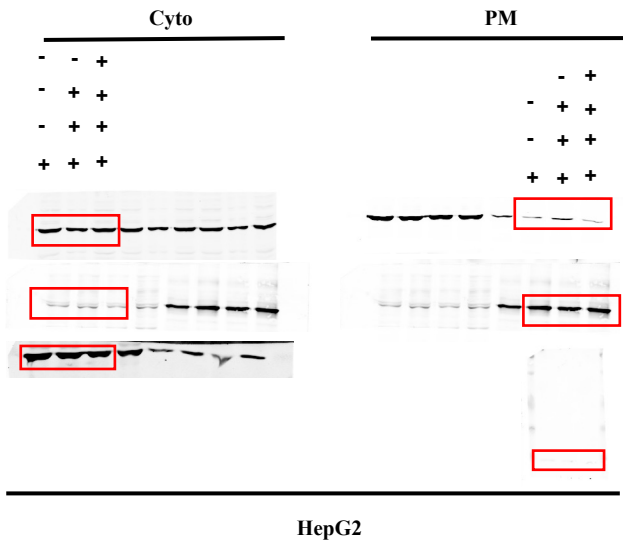**D**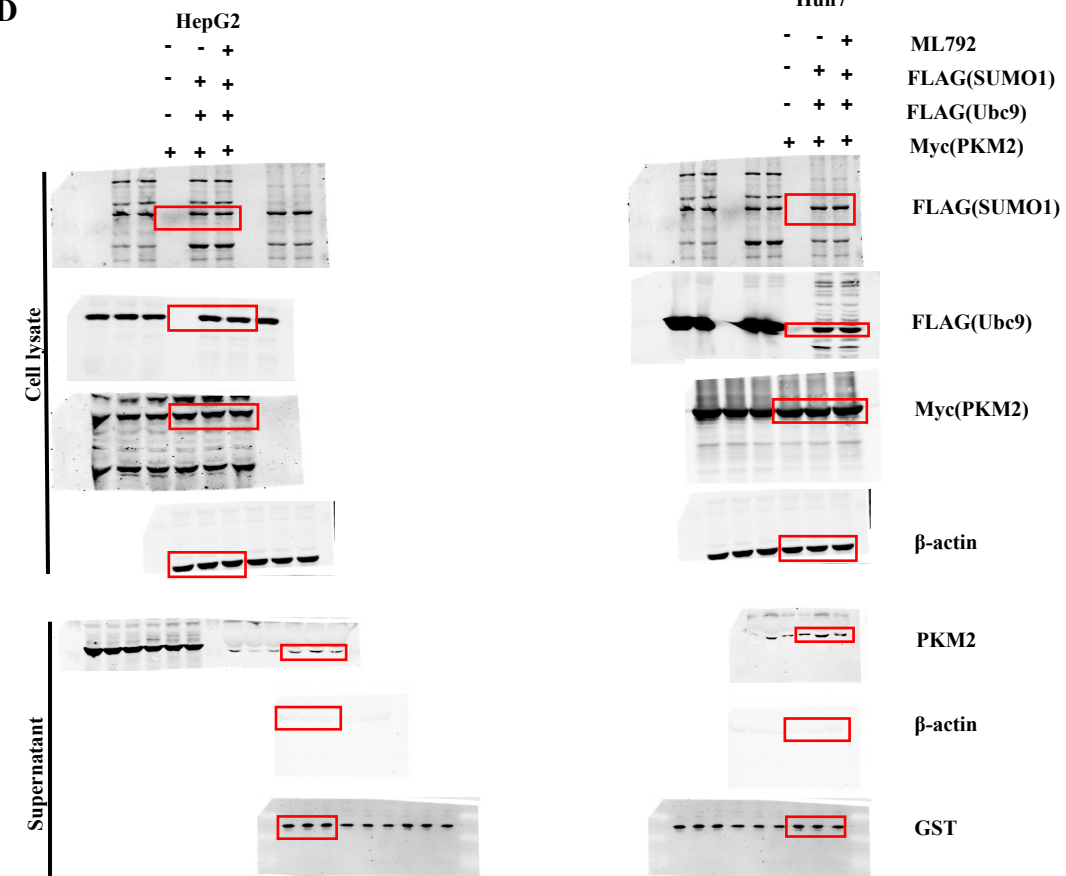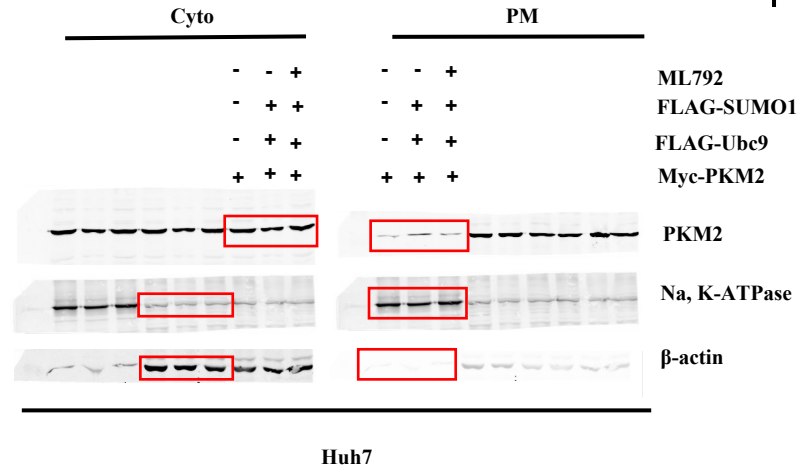

**Figure S3**

**E**

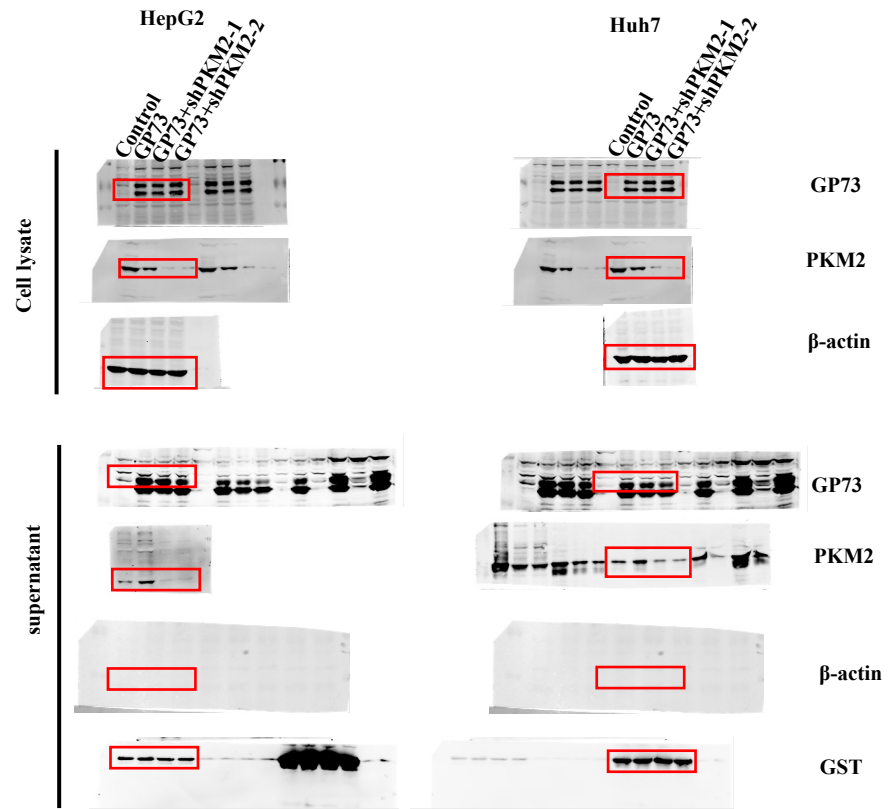

Supplement: 41419_2025_7391_MOESM3_ESM.pdf [file 41419_2025_7391_MOESM3_ESM.pdf]
